# Supplementary material for: Tuning the structure of metal phosphonates using uncoordinating methyl group: syntheses, structures and properties of a series of metal diphosphonates
Source: Royal Society of Chemistry journal article supplement (doi:10.1039/c4ce00375f), 2014-05-21
Supplement: c4ce00375f1.pdf [file c4ce00375f1.pdf]

**Tuning the Structure of Metal Phosphonate Using Uncoordinating Methyl group:  
Syntheses, Structures and Properties of a Series of Metal Diphosphonates**

**Si-Fu Tang, Liang-Jun Li, Xiao-Xia Lv, Chao Wang and Xue-Bo Zhao**

Table S1. Selected angles of compounds **1-8**.

|                       |            |                       |            |
|-----------------------|------------|-----------------------|------------|
| <b>1</b>              |            |                       |            |
| O(2)#1-Mn(1)-O(2)#2   | 179.03(10) | O(1)#3-Mn(1)-O(1W)    | 88.19(10)  |
| O(2)#1-Mn(1)-O(1)#3   | 93.21(7)   | O(1)-Mn(1)-O(1W)      | 172.85(9)  |
| O(2)#2-Mn(1)-O(1)#3   | 87.43(7)   | O(2)#1-Mn(1)-O(1W)#3  | 92.24(9)   |
| O(2)#1-Mn(1)-O(1)     | 87.43(7)   | O(2)#2-Mn(1)-O(1W)#3  | 87.06(9)   |
| O(2)#2-Mn(1)-O(1)     | 93.21(7)   | O(1)#3-Mn(1)-O(1W)#3  | 172.85(9)  |
| O(1)#3-Mn(1)-O(1)     | 96.67(11)  | O(1)-Mn(1)-O(1W)#3    | 88.19(10)  |
| O(2)#1-Mn(1)-O(1W)    | 87.06(9)   | O(1W)-Mn(1)-O(1W)#3   | 87.47(16)  |
| O(2)#2-Mn(1)-O(1W)    | 92.24(9)   |                       |            |
| <b>2</b>              |            |                       |            |
| O(1W)-Co(1)-O(2W)     | 88.49(9)   | O(6W)-Co(1)-O(3W)     | 87.33(9)   |
| O(1W)-Co(1)-O(6W)     | 177.74(8)  | O(4W)-Co(1)-O(3W)     | 172.55(8)  |
| O(2W)-Co(1)-O(6W)     | 92.82(9)   | O(1W)-Co(1)-O(5W)     | 92.27(9)   |
| O(1W)-Co(1)-O(4W)     | 93.78(9)   | O(2W)-Co(1)-O(5W)     | 175.97(9)  |
| O(2W)-Co(1)-O(4W)     | 87.22(9)   | O(6W)-Co(1)-O(5W)     | 86.30(9)   |
| O(6W)-Co(1)-O(4W)     | 88.12(9)   | O(4W)-Co(1)-O(5W)     | 96.67(8)   |
| O(1W)-Co(1)-O(3W)     | 90.90(9)   | O(3W)-Co(1)-O(5W)     | 88.92(8)   |
| O(2W)-Co(1)-O(3W)     | 87.11(9)   |                       |            |
| <b>3</b>              |            |                       |            |
| O(1W)-Co(1)-O(1W)#1   | 180.0      | O(3W)#1-Co(1)-O(2W)   | 90.44(15)  |
| O(1W)-Co(1)-O(3W)#1   | 89.07(15)  | O(3W)-Co(1)-O(2W)     | 89.56(15)  |
| O(1W)#1-Co(1)-O(3W)#1 | 90.93(15)  | O(1W)-Co(1)-O(2W)#1   | 91.03(17)  |
| O(1W)-Co(1)-O(3W)     | 90.93(15)  | O(1W)#1-Co(1)-O(2W)#1 | 88.97(17)  |
| O(1W)#1-Co(1)-O(3W)   | 89.07(15)  | O(3W)#1-Co(1)-O(2W)#1 | 89.49(15)  |
| O(3W)#1-Co(1)-O(3W)   | 180.0      | O(3W)-Co(1)-O(2W)#1   | 90.51(15)  |
| O(1W)-Co(1)-O(2W)     | 88.97(17)  | O(2W)-Co(1)-O(2W)#1   | 180.0      |
| O(1W)#1-Co(1)-O(2W)   | 91.03(17)  |                       |            |
| <b>4</b>              |            |                       |            |
| O(1W)-Ni(1)-O(2W)     | 87.40(10)  | O(6W)-Ni(1)-O(3W)     | 87.39(9)   |
| O(1W)-Ni(1)-O(6W)     | 177.92(10) | O(4W)-Ni(1)-O(3W)     | 173.21(9)  |
| O(2W)-Ni(1)-O(6W)     | 93.06(10)  | O(1W)-Ni(1)-O(5W)     | 92.69(10)  |
| O(1W)-Ni(1)-O(4W)     | 92.99(10)  | O(2W)-Ni(1)-O(5W)     | 176.98(10) |
| O(2W)-Ni(1)-O(4W)     | 86.96(10)  | O(6W)-Ni(1)-O(5W)     | 86.74(9)   |
| O(6W)-Ni(1)-O(4W)     | 89.06(9)   | O(4W)-Ni(1)-O(5W)     | 96.05(9)   |

|                       |            |                       |            |
|-----------------------|------------|-----------------------|------------|
| O(1W)-Ni(1)-O(3W)     | 90.61(9)   | O(3W)-Ni(1)-O(5W)     | 89.53(9)   |
| O(2W)-Ni(1)-O(3W)     | 87.45(10)  |                       |            |
| <b>5</b>              |            |                       |            |
| O(2)-Cu(1)-O(2)#1     | 180.0      | O(2)-Cu(1)-O(3)#3     | 87.99(11)  |
| O(2)-Cu(1)-O(3)#2     | 92.01(11)  | O(2)#1-Cu(1)-O(3)#3   | 92.01(11)  |
| O(2)#1-Cu(1)-O(3)#2   | 87.99(11)  | O(3)#2-Cu(1)-O(3)#3   | 180.0      |
| <b>6</b>              |            |                       |            |
| O(3W)-Zn(1)-O(3W)#1   | 180.0      | O(1W)-Zn(1)-O(2W)     | 88.76(12)  |
| O(3W)-Zn(1)-O(1W)     | 90.90(11)  | O(1W)#1-Zn(1)-O(2W)   | 91.24(12)  |
| O(3W)#1-Zn(1)-O(1W)   | 89.10(11)  | O(3W)-Zn(1)-O(2W)#1   | 89.94(11)  |
| O(3W)-Zn(1)-O(1W)#1   | 89.10(11)  | O(3W)#1-Zn(1)-O(2W)#1 | 90.06(11)  |
| O(3W)#1-Zn(1)-O(1W)#1 | 90.90(11)  | O(1W)-Zn(1)-O(2W)#1   | 91.24(12)  |
| O(1W)-Zn(1)-O(1W)#1   | 180.0      | O(1W)#1-Zn(1)-O(2W)#1 | 88.76(13)  |
| O(3W)-Zn(1)-O(2W)     | 89.94(11)  | O(2W)-Zn(1)-O(2W)#1   | 180.0      |
| O(3W)#1-Zn(1)-O(2W)   | 90.06(11)  |                       |            |
| <b>7</b>              |            |                       |            |
| O(1)-Zn(1)-O(1)#1     | 130.28(11) | O(1)-Zn(1)-O(1W)      | 105.88(7)  |
| O(1)-Zn(1)-O(2W)      | 102.19(7)  | O(1)#1-Zn(1)-O(1W)    | 105.88(7)  |
| O(1)#1-Zn(1)-O(2W)    | 102.19(7)  | O(2W)-Zn(1)-O(1W)     | 109.24(15) |
| <b>8</b>              |            |                       |            |
| O(3)#1-Cd(1)-O(3)     | 179.14(14) | O(2)#2-Cd(1)-O(1W)    | 84.98(13)  |
| O(3)#1-Cd(1)-O(2)#2   | 94.49(11)  | O(2)#3-Cd(1)-O(1W)    | 167.80(13) |
| O(3)-Cd(1)-O(2)#2     | 86.06(10)  | O(3)#1-Cd(1)-O(1W)#1  | 96.52(13)  |
| O(3)#1-Cd(1)-O(2)#3   | 86.06(11)  | O(3)-Cd(1)-O(1W)#1    | 82.87(13)  |
| O(3)-Cd(1)-O(2)#3     | 94.49(11)  | O(2)#2-Cd(1)-O(1W)#1  | 167.80(13) |
| O(2)#2-Cd(1)-O(2)#3   | 101.03(16) | O(2)#3-Cd(1)-O(1W)#1  | 84.98(13)  |
| O(3)#1-Cd(1)-O(1W)    | 82.87(13)  | O(1W)-Cd(1)-O(1W)#1   | 91.2(2)    |
| O(3)-Cd(1)-O(1W)      | 96.52(13)  |                       |            |

Symmetry transformations used to generate equivalent atoms: For **1**: #1  $x, -y, z-1/2$ ; #2  $-x+1, -y, -z+2$ ; #3  $-x+1, y, -z+3/2$ ; #4  $-x+3/2, -y+1/2, -z+2$ . For **3** and **6**: #1  $-x+1, -y+1, -z$ . For **5**: #1  $-x+2, -y+2, -z$ ; #2  $-x+1, -y+2, -z$ ; #3  $x+1, y, z$ . For **7**: #1  $x, -y+3/2, z$ . For **8**: #1  $-x+1, y, -z+1/2$ ; #2  $x, -y, z-1/2$ ; #3  $-x+1, -y, -z+1$ .

Table S2 Some O-H $\cdots$ O interactions found for compounds **1-8**.

| D-H      | H $\cdots$ A | D $\cdots$ A | <(DHA) |                          |
|----------|--------------|--------------|--------|--------------------------|
| <b>1</b> |              |              |        |                          |
| 0.82     | 1.83         | 2.638(2)     | 168.2  | O3-H3A $\cdots$ O1_\$1   |
| <b>2</b> |              |              |        |                          |
| 0.82     | 1.89         | 2.674(3)     | 158.8  | O2-H2A $\cdots$ O6_\$1   |
| 0.85     | 1.82         | 2.667(3)     | 176.4  | O1W-H2W $\cdots$ O5_\$3  |
| 0.85     | 1.99         | 2.832(3)     | 168.5  | O2W-H3W $\cdots$ O3W_\$4 |
| 0.85     | 2.00         | 2.748(3)     | 146.0  | O2W-H4W $\cdots$ O4W_\$5 |
| 0.85     | 1.94         | 2.787(3)     | 171.4  | O3W-H6W $\cdots$ O8W_\$6 |

|          |      |          |       |                    |
|----------|------|----------|-------|--------------------|
| 0.85     | 1.86 | 2.704(3) | 177.0 | O3W-H5W...O7W      |
| 0.85     | 1.98 | 2.681(3) | 139.4 | O4W-H7W...O3       |
| 0.85     | 1.86 | 2.707(3) | 171.6 | O6W-H11W...O3_\$5  |
| 0.85     | 1.96 | 2.806(3) | 174.7 | O6W-H12W...O7W_\$2 |
| 0.85     | 1.96 | 2.811(3) | 175.9 | O7W-H14W...O6_\$3  |
| 0.85     | 1.94 | 2.787(3) | 177.4 | O8W-H15W...O3_\$7  |
| <b>3</b> |      |          |       |                    |
| 0.82     | 1.66 | 2.445(5) | 160.7 | O1-H1A...O4_\$1    |
| 0.82     | 1.74 | 2.545(5) | 166.0 | O2-H2A...O6_\$2    |
| 0.82     | 1.76 | 2.578(5) | 177.6 | O5-H5A...O3_\$3    |
| 0.85     | 1.87 | 2.701(7) | 165.1 | O1W-H1W...O4W      |
| 0.85     | 1.99 | 2.823(7) | 167.7 | O1W-H1W...O4W_\$4  |
| 0.85     | 2.00 | 2.815(5) | 161.6 | O2W-H3W...O4_\$5   |
| 0.85     | 1.98 | 2.785(5) | 158.9 | O3W-H5W...O6_\$1   |
| <b>4</b> |      |          |       |                    |
| 0.82     | 1.89 | 2.668(3) | 159.0 | O2-H2A...O6_\$1    |
| 0.85     | 1.82 | 2.672(3) | 177.4 | O1W-H2W...O5_\$3   |
| 0.85     | 2.00 | 2.844(3) | 169.5 | O2W-H3W...O3W_\$4  |
| 0.85     | 2.00 | 2.755(3) | 146.7 | O2W-H4W...O4W_\$5  |
| 0.85     | 1.93 | 2.778(3) | 171.7 | O3W-H6W...O8W_\$6  |
| 0.85     | 1.86 | 2.710(3) | 176.3 | O3W-H5W...O7W      |
| 0.85     | 1.98 | 2.680(3) | 139.1 | O4W-H7W...O3       |
| 0.85     | 1.85 | 2.696(3) | 172.6 | O6W-H11W...O3_\$5  |
| 0.85     | 1.96 | 2.807(3) | 175.5 | O6W-H12W...O7W_\$2 |
| 0.85     | 1.96 | 2.804(3) | 175.3 | O7W-H14W...O6_\$3  |
| 0.85     | 1.93 | 2.782(3) | 177.5 | O8W-H15W...O3_\$7  |
| <b>6</b> |      |          |       |                    |
| 0.82     | 1.66 | 2.449(3) | 160.9 | O1-H1A...O4_\$1    |
| 0.82     | 1.75 | 2.555(3) | 166.2 | O2-H2A...O6_\$2    |
| 0.82     | 1.77 | 2.588(3) | 177.5 | O5-H5A...O3_\$3    |
| 0.85     | 1.87 | 2.703(5) | 165.8 | O1W-H1W...O4W      |
| 0.85     | 1.98 | 2.816(5) | 167.3 | O1W-H1W...O4W_\$4  |
| 0.85     | 2.00 | 2.815(4) | 161.7 | O2W-H3W...O4_\$5   |
| 0.85     | 1.98 | 2.794(3) | 159.3 | O3W-H5W...O6_\$1   |
| <b>7</b> |      |          |       |                    |
| 0.82     | 1.79 | 2.545(2) | 153.1 | O2-H2A...O3_\$1    |
| 0.85     | 1.85 | 2.696(2) | 176.3 | O1W-H1W...O3_\$2   |
| 0.85     | 1.88 | 2.724(2) | 173.6 | O2W-H3W...O2_\$3   |
| <b>8</b> |      |          |       |                    |
| 0.82     | 1.84 | 2.654(4) | 169.3 | O1-H1A...O2_\$1    |

Operators for generating equivalent atoms: **1**: \$1x, -y+1, z+1/2. **2** and **4**: \$1 x, y-1, z; \$2 x-1, y, z; \$3 x+1, y, z; \$4 -x+2, -y+1, -z; \$5 -x+1, -y+1, -z; \$6 -x+1, -y+2, -z; \$7 x, y+1, z. **3** and **6**: \$1 -x+2, -y+2, -z; \$2 -x+2, y-1/2, -z+1/2; \$3 -x+2, y+1/2, -z+1/2;

4:  $-x+1, y-1/2, -z-1/2$ ; 5:  $-x+2, -y+1, -z$ . 5:  $x-1, y, z$ ; 2:  $-x+2, -y+1, -z$ ; 3:  $x+1, y-1, z$ . 7:  $x, -y, z-1/2$ ; 2:  $-x+1, y, -z+1/2$ . 7:  $x-1/2, y, -z-1/2$ ; 2:  $x+1/2, y, -z-1/2$ ; 3:  $x+1/2, y, -z+1/2$ . 8:  $x, -y, z-1/2$ ; 2:  $-x+1, y, -z+1/2$ ; 3:  $x, -y+1, z-1/2$ .

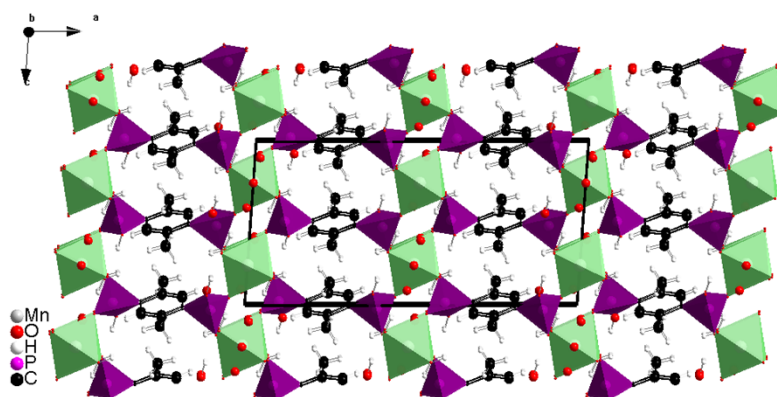

Figure S1. Three-dimensional packing diagram of compound **1** viewing along  $b$ -direction. The  $\text{CPO}_3$  tetrahedrons and  $\text{MnO}_6$  octahedrons are shaded in pink and green respectively.  $\text{O-H}\cdots\text{O}$  interactions are shown as dash lines.

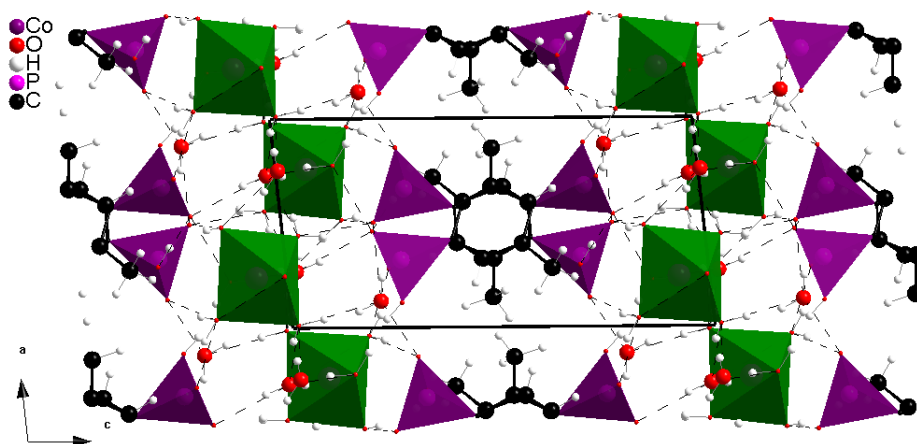

Figure S2. Three-dimensional packing diagram of compound **2** viewing along  $b$ -direction. The  $\text{CPO}_3$  tetrahedrons and  $\text{CoO}_6$  octahedrons are shaded in pink and green respectively.  $\text{O-H}\cdots\text{O}$  interactions are shown as dash lines.

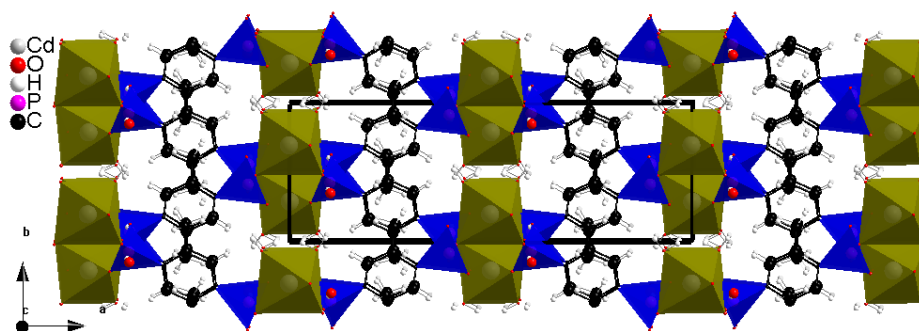

Figure S3. Three-dimensional packing diagram of compound **7** viewing along *c*-direction. The  $\text{CPO}_3$  tetrahedrons and  $\text{CdO}_6$  octahedrons are shaded in pink and green respectively.

Table S3. Comparison of the structures reported in this paper and those from literature synthesis condition used for 1,4-phenyldiphosphonic acid.

|    | Synthesis conditions |                                                                                                                                                             | product                                   | structure                                          |
|----|----------------------|-------------------------------------------------------------------------------------------------------------------------------------------------------------|-------------------------------------------|----------------------------------------------------|
| Co | Literature method    | $\text{Co}(\text{en})_3\text{Cl}_3$ (0.3 mmol, 0.12 g), $\text{H}_4\text{L}$ (0.3 mmol, 0.0798 g), 8 ml $\text{H}_2\text{O}$ , pH=3-4, 140 °C, 54 h         | Blue green powder and pink plate crystals | Unknown phases (see Figure S11)                    |
|    | This paper           | $\text{H}_4\text{L}$ (0.0665 g), $\text{Co}(\text{ac})_2 \cdot 4\text{H}_2\text{O}$ (0.0623 g), 3 mL $\text{H}_2\text{O}$ , 160 °C, 3 days                  | Pink block crystals                       | Compound <b>2</b>                                  |
|    |                      | $\text{H}_4\text{L}$ (0.0665 g), $\text{CoCl}_2 \cdot 6\text{H}_2\text{O}$ (0.0595 g), 3 mL $\text{H}_2\text{O}$ , 160 °C, 3 days                           | Pink block crystals                       | Compound <b>3</b>                                  |
| Ni | Literature method    | $\text{NiSO}_4 \cdot 6\text{H}_2\text{O}$ (0.2 mmol, 0.0525 g), $\text{H}_4\text{L}$ (0.2 mmol, 0.0532 g), 8 ml $\text{H}_2\text{O}$ , pH=3-4, 140 °C, 54 h | Clear solution                            | ---                                                |
|    |                      | $\text{NiSO}_4 \cdot 6\text{H}_2\text{O}$ (0.2 mmol, 0.0525 g), $\text{H}_4\text{L}$ (0.2 mmol, 0.0532 g), 2 ml $\text{H}_2\text{O}$ , pH=3-4, 140 °C, 54 h | Small green block crystals                | Same to that of compound <b>4</b> (see Figure S12) |
|    | This paper           | $\text{H}_4\text{L}$ (0.0665 g, 0.25 mmol), $\text{NiSO}_4 \cdot \text{H}_2\text{O}$ (0.1586 g, 0.25 mmol), 10 mL $\text{H}_2\text{O}$ , 160 °C, 3 days     | Green block crystals                      | Compound <b>4</b>                                  |
| Zn | Literature method    | $\text{ZnCl}_2$ (1 mmol, 0.136 g), $\text{H}_4\text{L}$ (0.5 mmol, 0.1331 g), 60 °C, 7 days                                                                 | Small colorless crystals                  | Compound <b>7</b>                                  |
|    | This paper           | $\text{H}_4\text{L}$ (0.0665 g), $\text{ZnCl}_2$ (0.0623 g), 3 mL $\text{H}_2\text{O}$ , 160 °C, 3 days                                                     |                                           | Compound <b>6</b>                                  |

|    |                   |                                                                                                                                                    |                     |                                                    |
|----|-------------------|----------------------------------------------------------------------------------------------------------------------------------------------------|---------------------|----------------------------------------------------|
| Cu | Literature method | CuSO <sub>4</sub> ·5H <sub>2</sub> O (1 mmol, 0.2497 g), H <sub>4</sub> L (0.25 mmol, 0.0665 g), 60 °C 1 day                                       | Blue plate crystals | Same to that of compound <b>5</b> (see Figure S13) |
|    | This paper        | H <sub>4</sub> L (0.0887 g, 0.3333 mmol), CuSO <sub>4</sub> ·5H <sub>2</sub> O (0.1665 g, 0.6666 mmol), and 10 mL H <sub>2</sub> O, 160 °C, 3 days | Blue plate crystals | Compound <b>5</b>                                  |

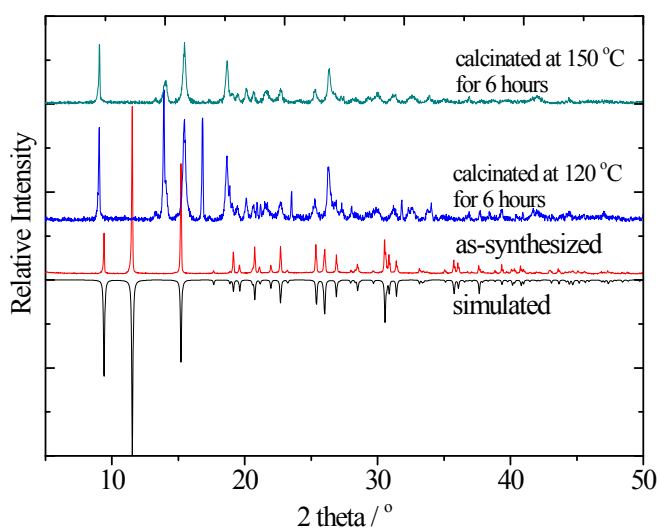

Figure S4. Comparison of simulated and experimental XRD pattern of compound **1**.

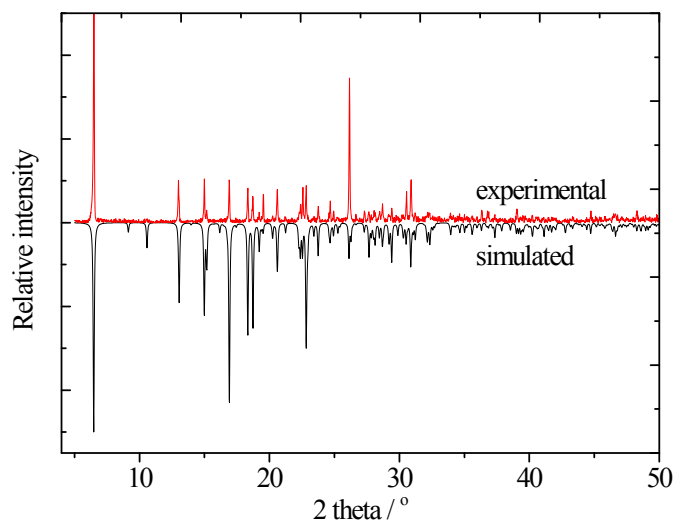

Figure S5. Comparison of simulated and experimental XRD pattern of compound **2**.

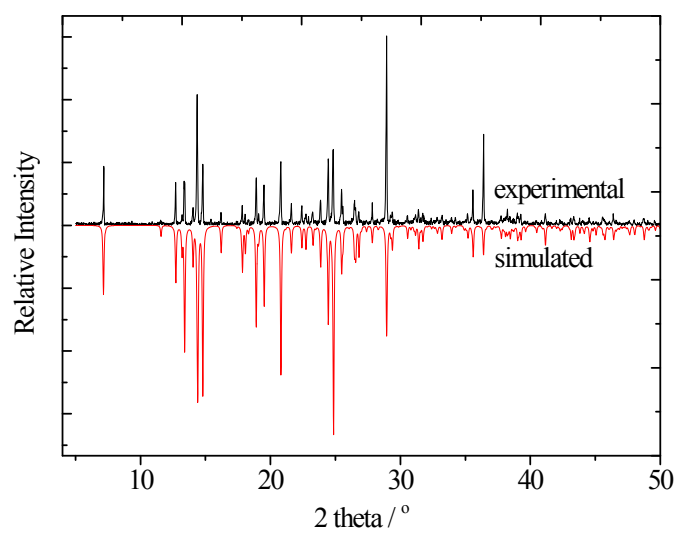

Figure S6. Comparison of simulated and experimental XRD pattern of compound **3**.

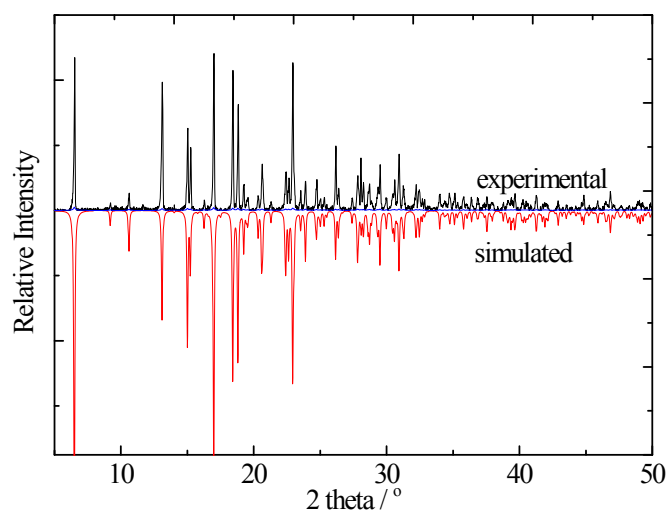

Figure S7. Comparison of simulated and experimental XRD pattern of compound **4**.

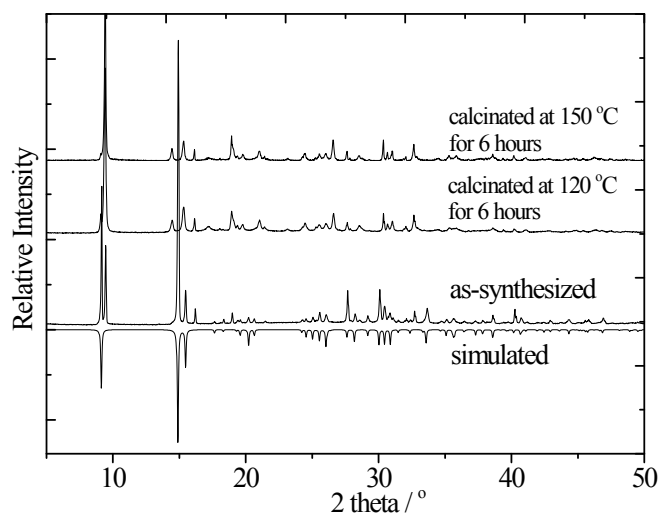

Figure S8. Comparison of simulated and experimental XRD pattern of compound **5**.

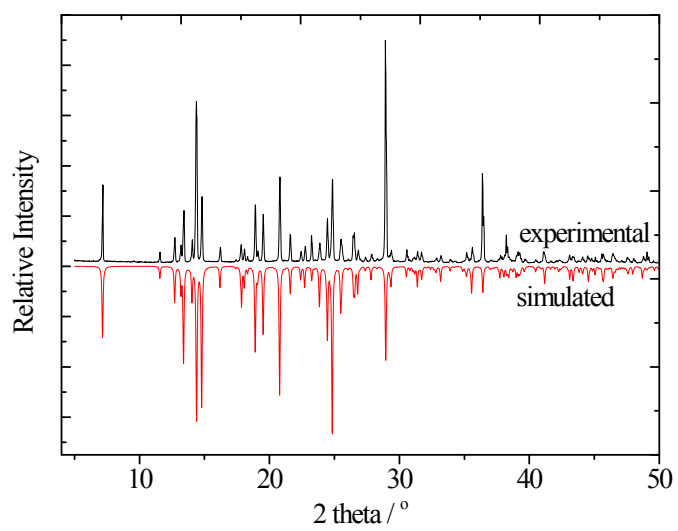

Figure S9. Comparison of simulated and experimental XRD pattern of compound **6**.



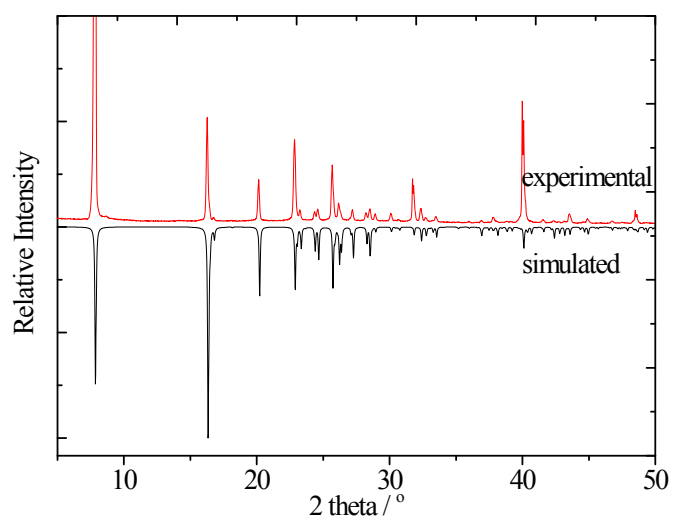

Figure S10. Comparison of simulated and experimental XRD pattern of compound **7**.

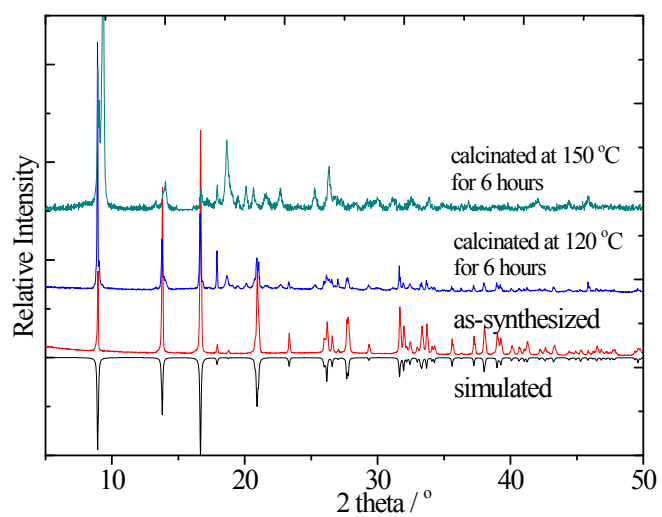

Figure S10. Comparison of simulated and experimental XRD pattern of compound **8**.

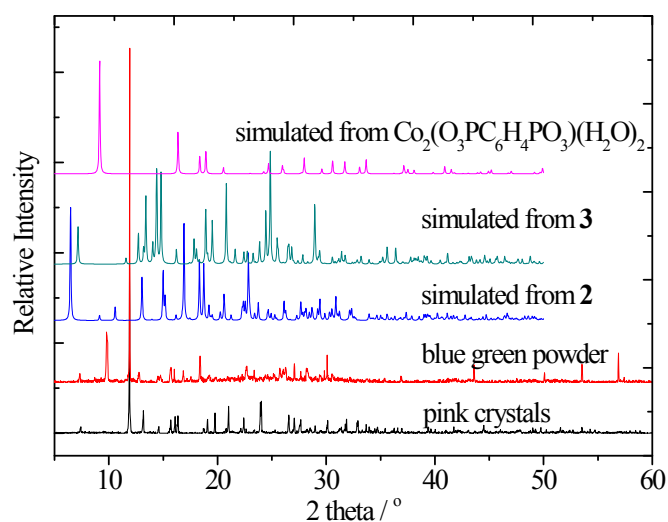

Figure S11. Comparison of the XRD pattern of the products synthesized from  $\text{Co}(\text{en})_3\text{Cl}_3$  and  $\text{H}_4\text{L}$  and those from simulated compounds **2** and **3** and simulated from  $\text{Co}_2(\text{O}_3\text{PC}_6\text{H}_4\text{PO}_3)(\text{H}_2\text{O})_2$  reported in the literature (D.-K. Cao, S. Gao, L.-M. Zheng, *J. Solid State Chem.*, 2004, **177**, 2311-2315.).

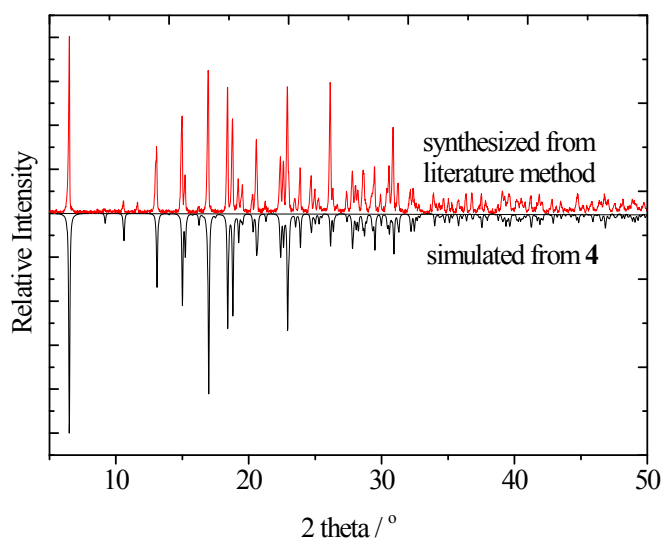

Figure S12. Comparison of the simulated and experimental XRD pattern of the product synthesized from  $\text{NiSO}_4 \cdot 6\text{H}_2\text{O}$  and  $\text{H}_4\text{L}$  using literature method.

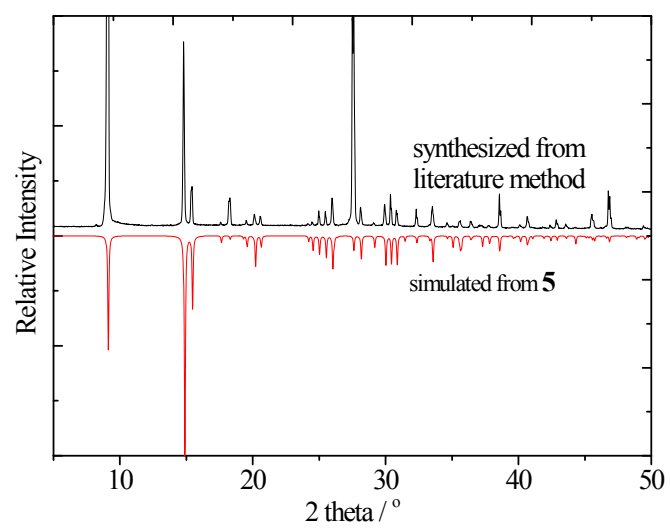

Figure S13. Comparison of the simulated and experimental XRD pattern of the product synthesized from  $\text{CuSO}_4 \cdot 5\text{H}_2\text{O}$  and H4L using literature method.
